# Supplementary material for: Microbial communities in placentas from term normal pregnancy exhibit spatially variable profiles
Source: Sci Rep. 2017 Sep 11;7:11200. doi: 10.1038/s41598-017-11514-4 (PMC5593928; doi:10.1038/s41598-017-11514-4)

**Microbial communities in placentas from term normal pregnancy exhibit  
spatially variable profiles**

Lindsay A. Parnell<sup>1</sup> Catherine M. Briggs<sup>1\*</sup>, Bin Cao<sup>1\*</sup>, Omar Delannoy-Bruno<sup>1</sup>,  
Andrew E. Schrieffer<sup>2</sup>, Indira U. Mysorekar<sup>1,3\$</sup>

## **Supplementary Table Legends**

Table S1: **Clinical and Demographic Features of Human Subjects**

Table S2: **Sequences of primer pairs used to generate 16S amplicons (V1 – V9)**

Table S3: **Read and Sample Summary of V1-V9 datasets with detectable OTUs**

| <b>Clinical characteristics</b> | <b>Mean <math>\pm</math> SD</b> |
|---------------------------------|---------------------------------|
| Age (yrs)                       | 28.86 $\pm$ 0.67                |
| BMI at first pregnancy visit    | 29.35 $\pm$ 1.21                |
| BMI at delivery                 | 33.90 $\pm$ 1.06                |
| Infant weight (g)               | 3187.39 $\pm$ 88.16             |
| Gestation Age (days)            | 273.19 $\pm$ 1.25               |

| <b>Percent</b>   |                         |    |        |
|------------------|-------------------------|----|--------|
| Race             | Asian/ Pacific Islander | 2  | 3.51%  |
|                  | Black                   | 19 | 33.33% |
|                  | Native American         | 1  | 1.75%  |
|                  | White                   | 35 | 61.40% |
| Gestation Number | 1                       | 50 | 87.72% |
|                  | 2                       | 7  | 12.28% |
|                  | 3                       | 0  | 0.00%  |
| Fetal Sex        | Male                    | 25 | 43.86% |
|                  | Female                  | 32 | 56.14% |

|                    | <b>Number (yes)</b> | <b>Percent (yes)</b> |
|--------------------|---------------------|----------------------|
| Vaginal Delivery   | 34                  | 59.65%               |
| Cesarean Section   | 23                  | 40.35                |
| Multiple Gestation | 7                   | 12.28%               |

Table S1: **Clinical and Demographic Features of Human Subjects**

| Amplicon Size | Variable Region | Primer Name | Fluidigm Forward Adapter   | Forward Sequence             | Primer Name | Fluidigm Reverse Adapter       | Reverse Sequence         | Miseq 2x150 F/R overlap | Strand bias F,R | PMID                  | Forward Pubmed historic name | Reverse Pubmed historic name |
|---------------|-----------------|-------------|----------------------------|------------------------------|-------------|--------------------------------|--------------------------|-------------------------|-----------------|-----------------------|------------------------------|------------------------------|
| 113           | V1              | V1          | ACACTGACGAC<br>ATGGTTCTACA | AGAGTTTGA<br>TCMTGGCTC<br>AG | V1          | TACGGTAGCA<br>GAGACTTGGTC<br>T | TTACTCACCCG<br>TTCGCCRCT | all                     | 0               | 18047683              |                              |                              |
| 261           | V2              | V2          | ACACTGACGAC<br>ATGGTTCTACA | AGYGGCGIA<br>CGGGTGAGT<br>AA | V2          | TACGGTAGCA<br>GAGACTTGGTC<br>T | CYACTGCTGC<br>CTCCCGTAG  | 39                      | 111,111         | 18047683              |                              |                              |
| 170           | V3              | V3_2        | ACACTGACGAC<br>ATGGTTCTACA | CCTACGGGA<br>GGCAGCAG        | V3_2        | TACGGTAGCA<br>GAGACTTGGTC<br>T | GTATTACCGCG<br>GCTGCTGG  | 130                     | 20,20           | 22853944,<br>21460107 | F341                         | R518                         |
| 250           | V4              | V4          | ACACTGACGAC<br>ATGGTTCTACA | GTGCCAGC<br>MGCCGCGG<br>TAA  | V4          | TACGGTAGCA<br>GAGACTTGGTC<br>T | GGACTACHVG<br>GGTWTCTAAT | 50                      | 100, 100        | 22179717,<br>20534432 | F515                         | R806                         |
| 100           | V5              | V5_2        | ACACTGACGAC<br>ATGGTTCTACA | AGGATTAGA<br>TACCCT          | V5_2        | TACGGTAGCA<br>GAGACTTGGTC<br>T | CRTACTHCHCA<br>GGYG      | all                     | 0               | 22853944              | 784F                         | 880R                         |
| 167           | V6              | V6_1        | ACACTGACGAC<br>ATGGTTCTACA | AAACTCAA<br>KGAATTGAC<br>GG  | V6_1        | TACGGTAGCA<br>GAGACTTGGTC<br>T | ACGAGCTGAC<br>GACARCCATG | 133                     | 17,17           | 18047683              |                              |                              |
| 300           | V7-V8           | V7-V8       | ACACTGACGAC<br>ATGGTTCTACA | GYAACGAGC<br>GCAACCC         | V7-V8       | TACGGTAGCA<br>GAGACTTGGTC<br>T | GACGGGCGGT<br>GWGTRC     | 0                       | all             | 20880993              | 1099                         | 1407                         |
| 116           | V9              | V9          | ACACTGACGAC<br>ATGGTTCTACA | GTACACACC<br>GCCCCGT         | V9          | TACGGTAGCA<br>GAGACTTGGTC<br>T | TACCTTGTTAC<br>GACTT     | all                     | 0               | 18047683              |                              |                              |

**Table S2. Sequences of primer pairs used to generate 16S amplicons (V1 – V9)**

| <b>Variable<br/>Region</b> | <b>Mean<br/>read<br/>number</b> | <b>St. error<br/>read<br/>number</b> | <b>Total<br/>read<br/>number</b> | <b>Max read<br/>number</b> | <b>Number<br/>of<br/>Samples</b> |
|----------------------------|---------------------------------|--------------------------------------|----------------------------------|----------------------------|----------------------------------|
| V1                         | 1224.64                         | 218.33                               | 106544                           | 10627                      | 87                               |
| V2                         | 4622.7                          | 374.3                                | 855200                           | 21637                      | 185                              |
| V3                         | 1088.16                         | 192.12                               | 178458                           | 18400                      | 164                              |
| V4                         | 2160.91                         | 277.61                               | 345746                           | 23972                      | 160                              |
| V5                         | 1492.38                         | 273.55                               | 141776                           | 17737                      | 95                               |
| V6                         | 13733.23                        | 988.06                               | 2609314                          | 58301                      | 190                              |
| V9                         | 1201.23                         | 201.09                               | 108111                           | 11342                      | 90                               |

Table S3: **Read and Sample Summary of V1-V9 datasets with detectable OTUs**

## Supplementary Figure Legends

Fig. S1: **Detected microbial taxa within control samples.** Total number of OTUs (y-axis) detected within each phyla (x-axis) by variable region (row) for a given control (column). The dots within the bars represent unique samples within respective control group (E. coli, n = 8; Blank, n = 8; Water, n = 5). The height of each bar represents total OTUs detected in each control. Each colored bar represents relative abundance of a given phylum. The horizontal lines within each phylum represent a unique OTU.

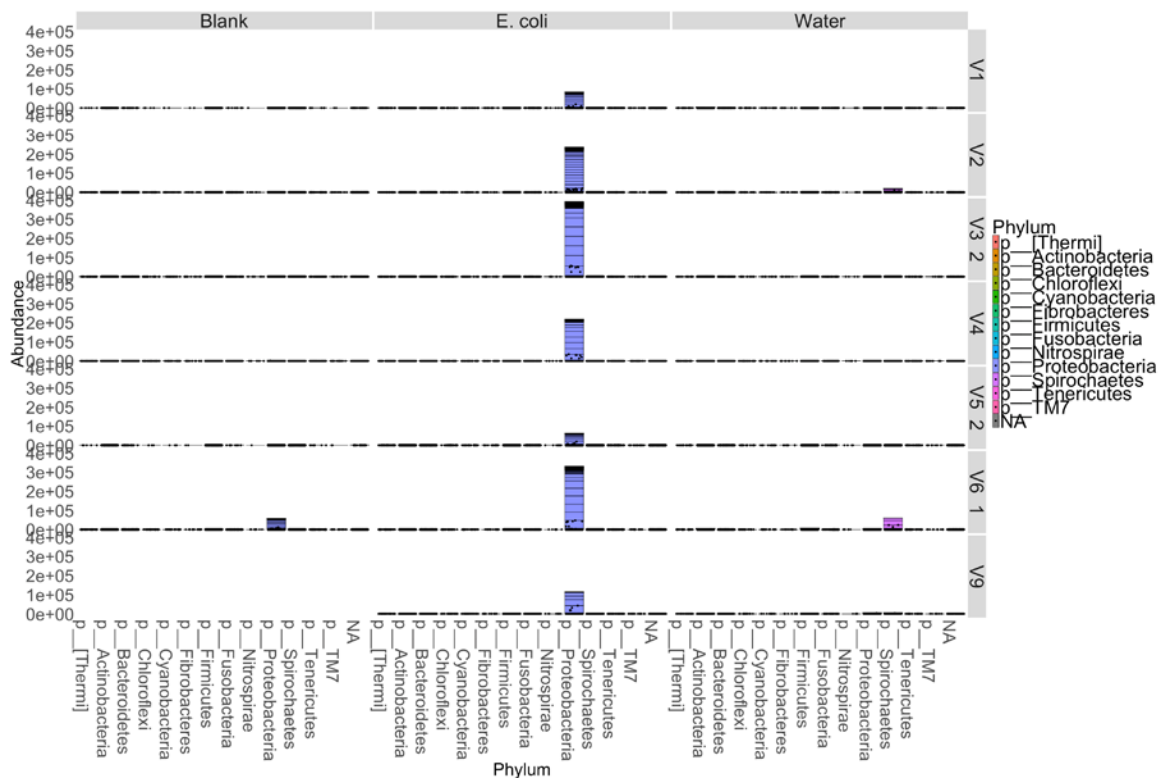

**Fig. S2: Relative abundance of each microbial phyla detected in samples per placental location:** (A) BP (B) PV and (C) FM using V1, V2, V3\_2, V4, V5\_2, V6\_1, and V9 amplicons. Each bar represents total OTUs detected in the sample. Each color represents a different phylum and the horizontal lines within each phylum represent a unique OTU. The labels correspond to the raw data presented as Fasta files in NCBI GenBank.

V1

(A) Basal Plate

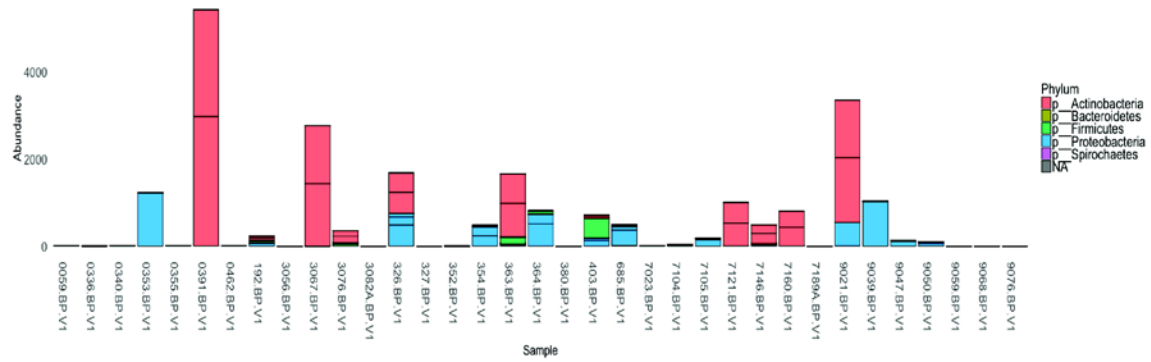

(B) Placental Villus

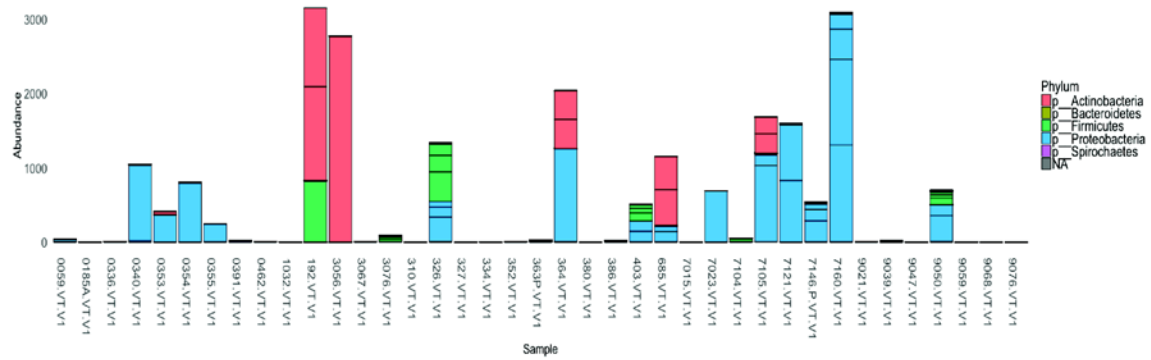

(C) Fetal Membrane

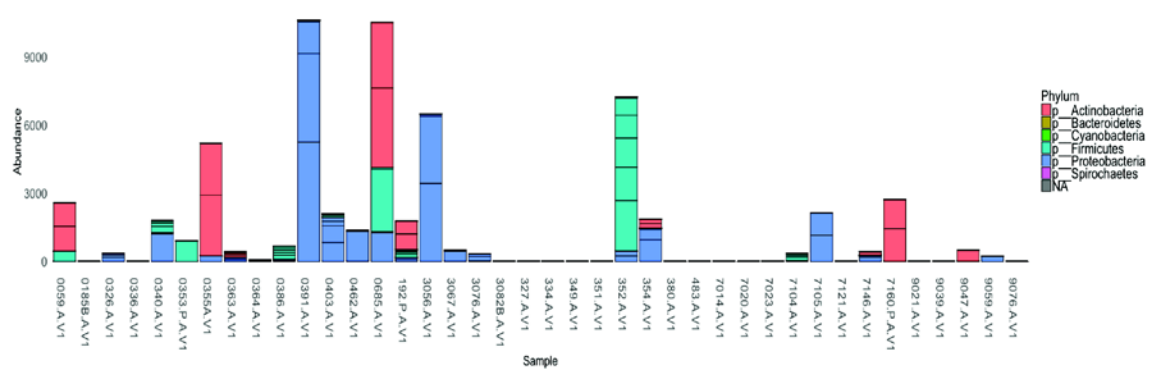

V2

(A) Basal Plate

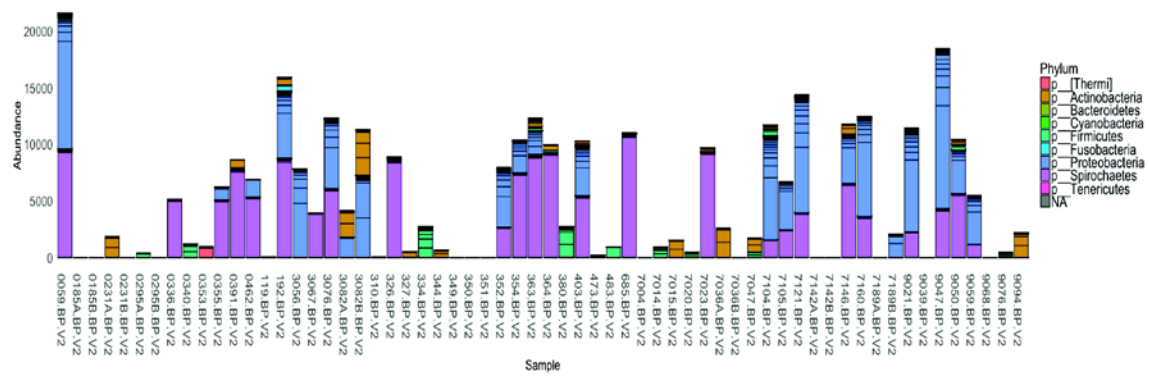

(B) Placental Villus

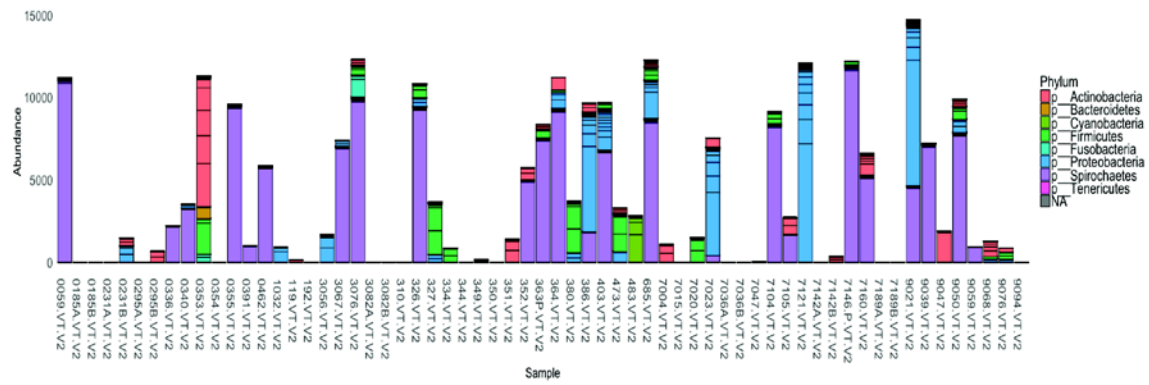

(C) Fetal Membrane

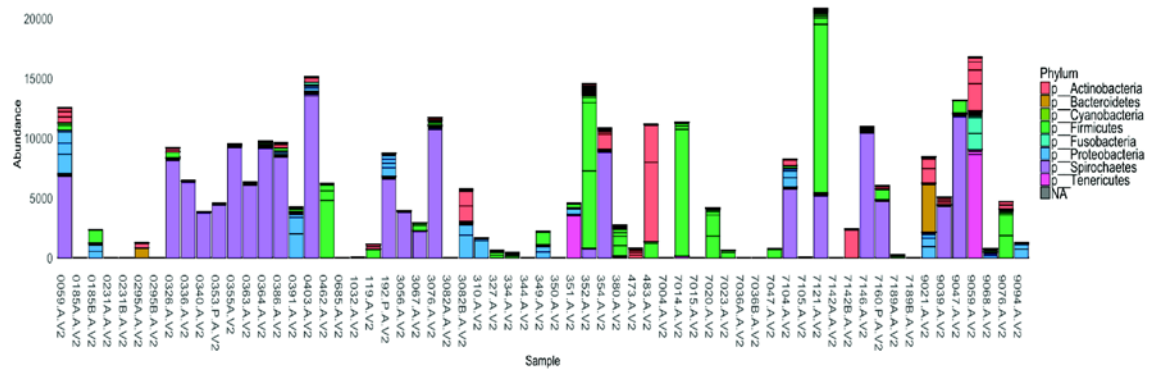

V3\_2

(A) Basal Plate

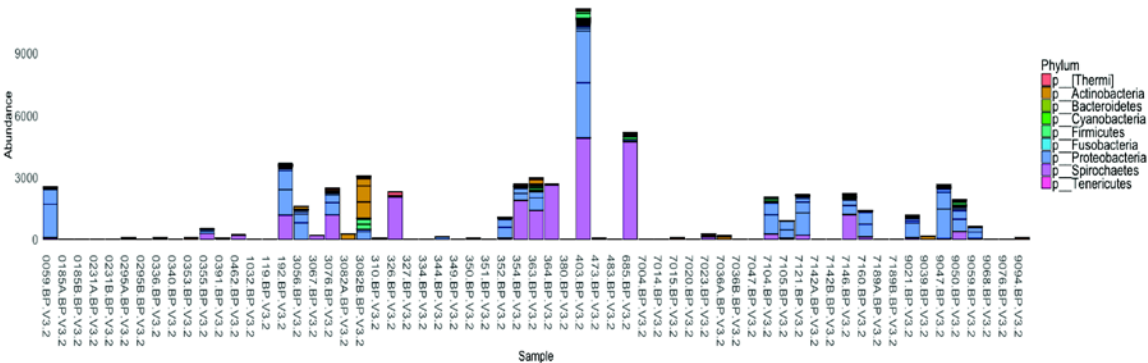

(B) Placental Villus

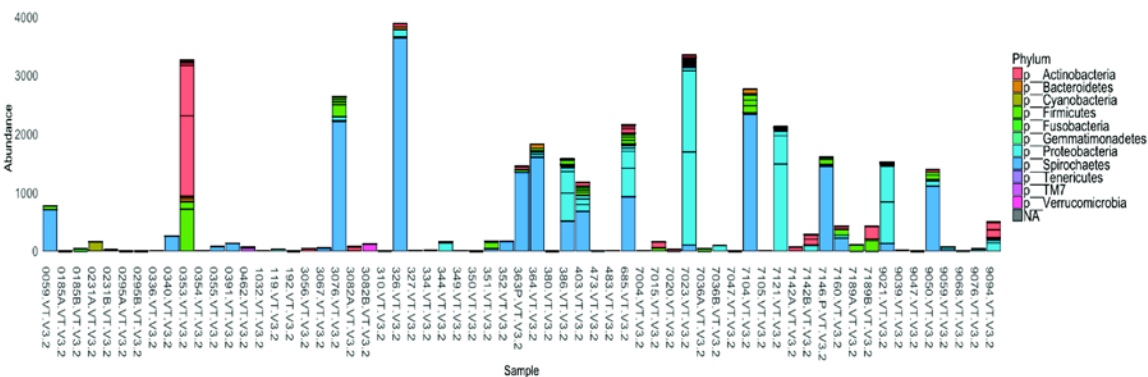

(C) Fetal Membrane

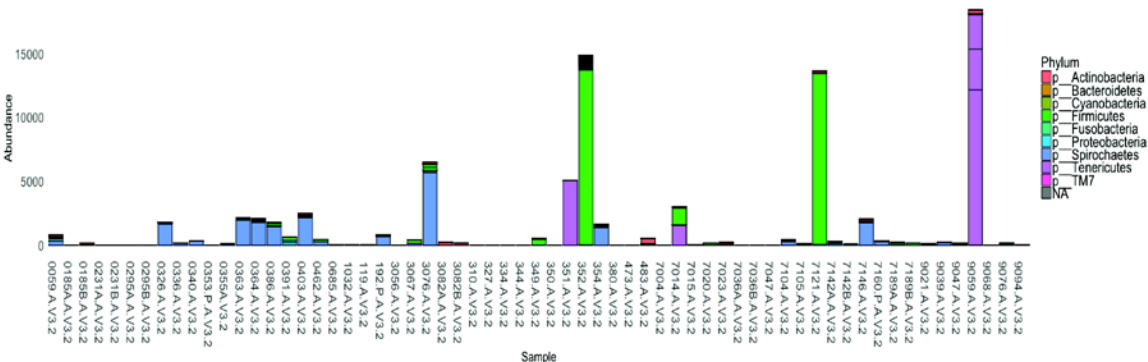

# V4

## (A) Basal Plate

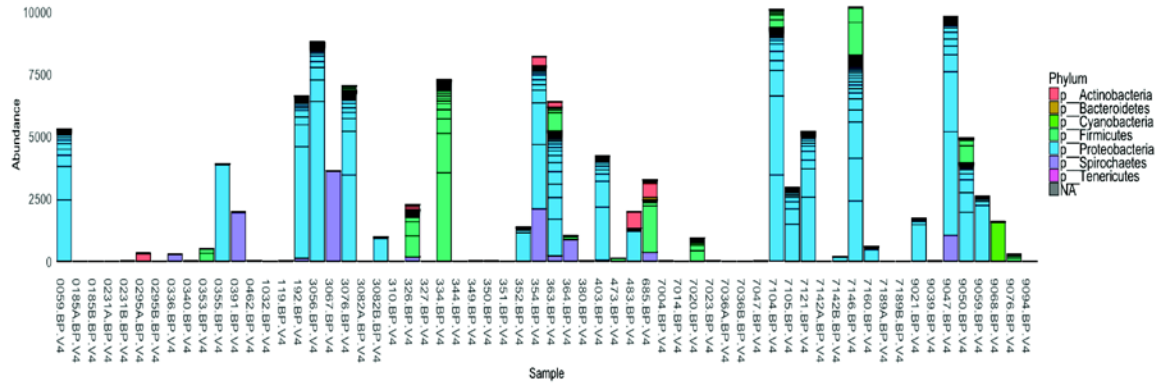

## (B) Placental Villus

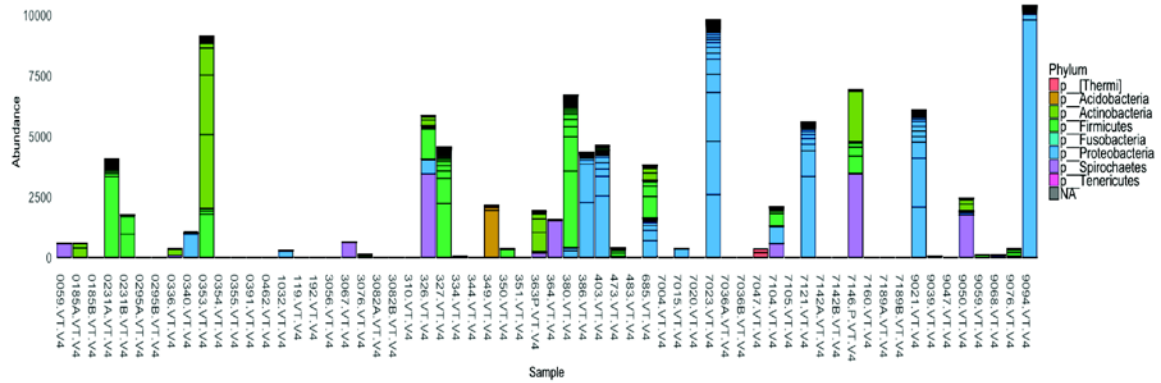

## (C) Fetal Membrane

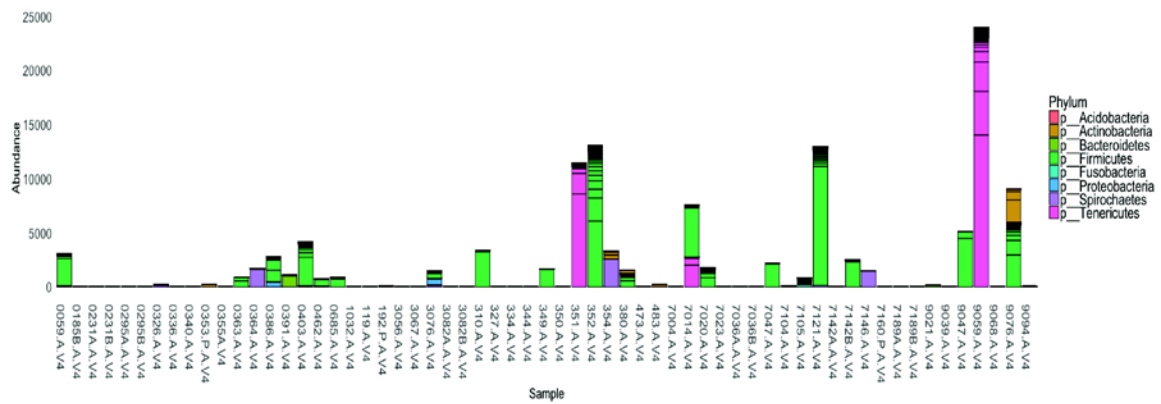

V5\_2

### (A) Basal Plate

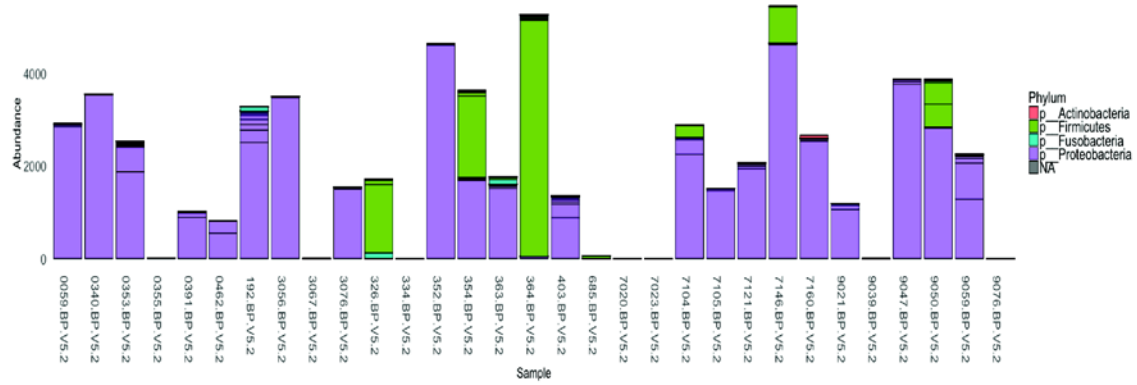

### (B) Placental Villus

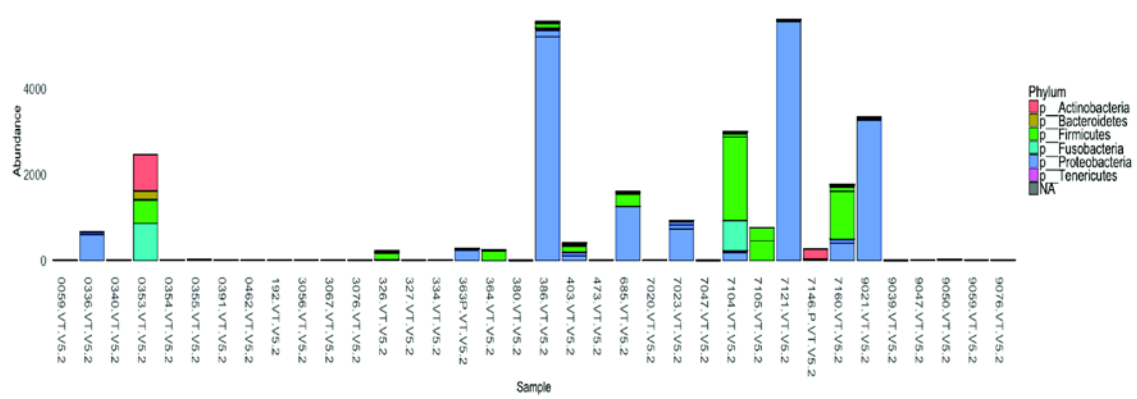

### (C) Fetal Membrane

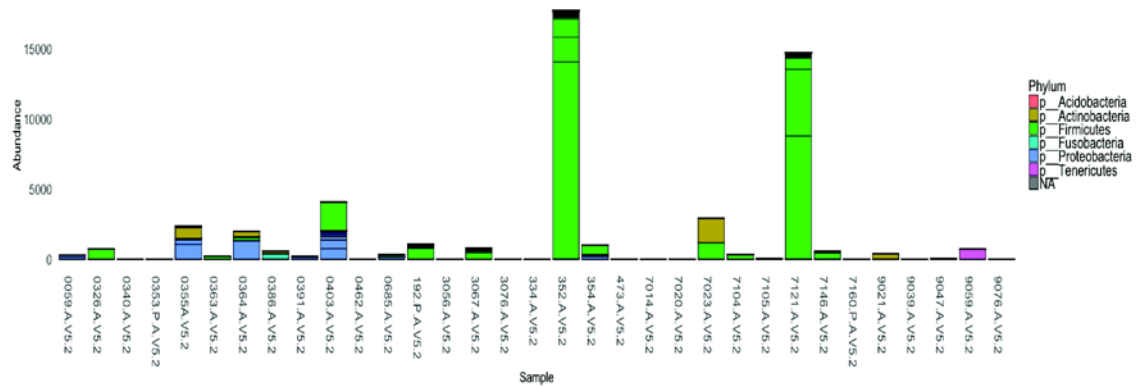

V6\_1

(A) Basal Plate

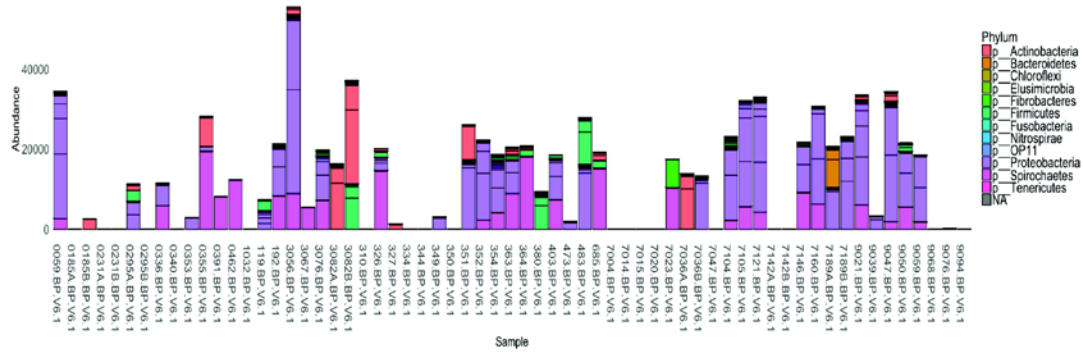

(B) Placental Villus

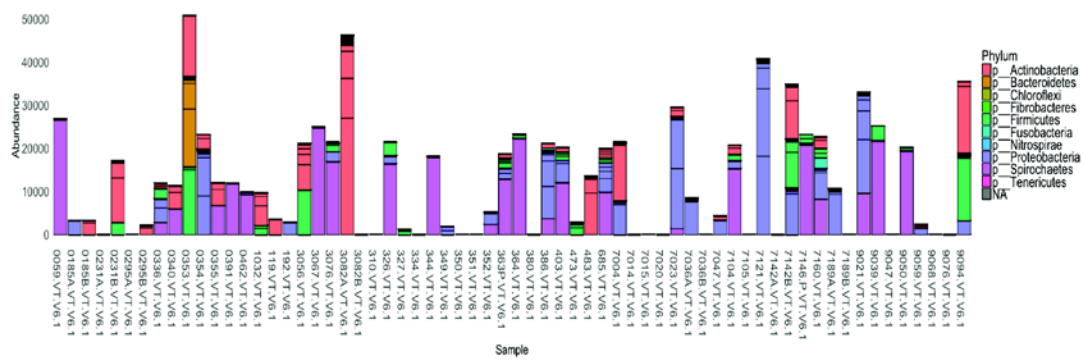

(C) Fetal Membrane

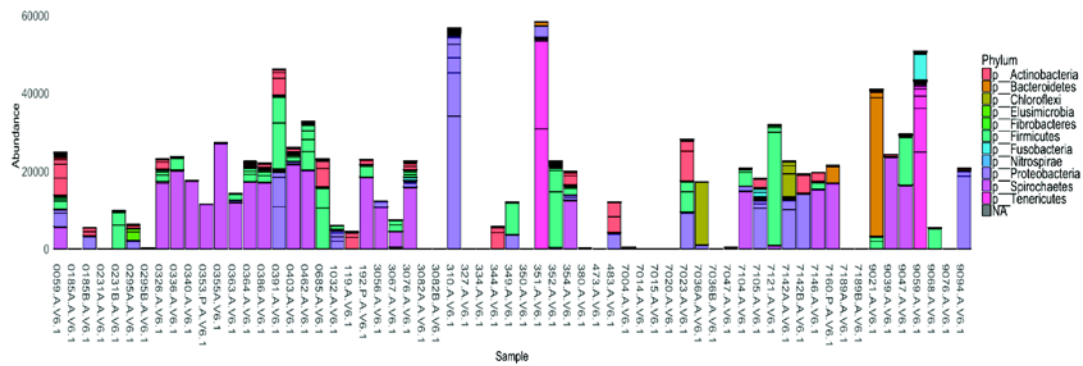

V9

(A) Basal Plate

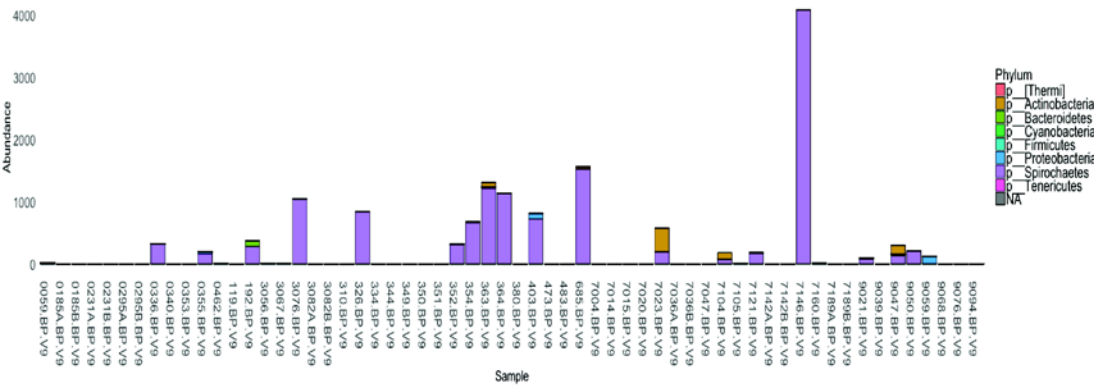

(B) Placental Villus

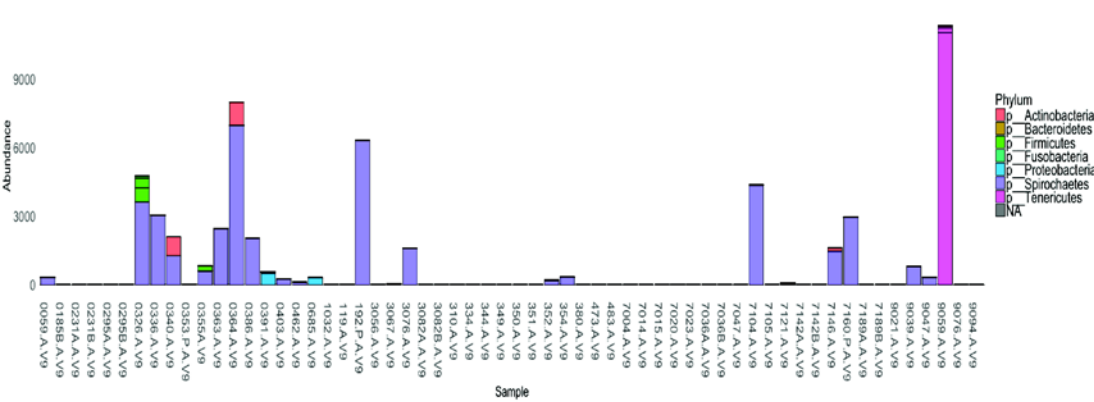

(C) Fetal Membrane

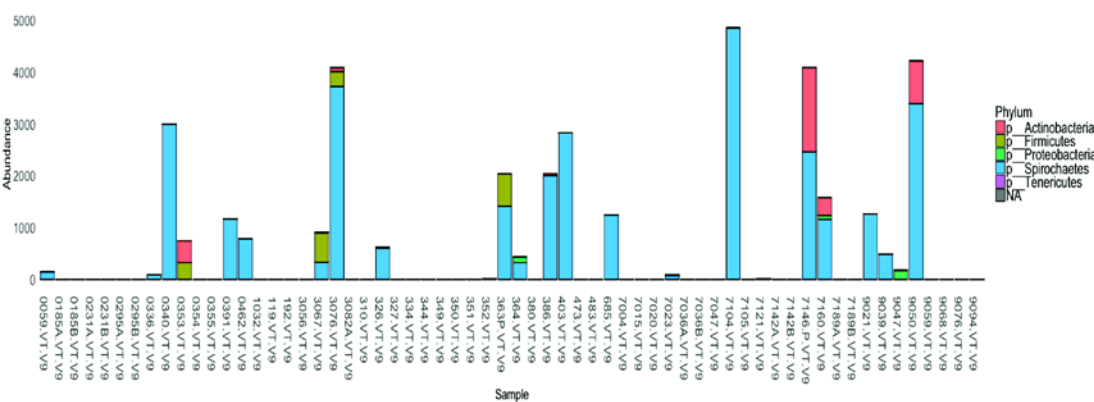

Fig. S3. **Multiple Rarefaction Curves of V4 samples.** The expected Shannon diversity ( $H$ ), which assesses the even-ness and abundance of OTUs, per sample (each color) is shown at multiple sequencing depths (at a step-size of 10, starting from 10 to 300 reads).

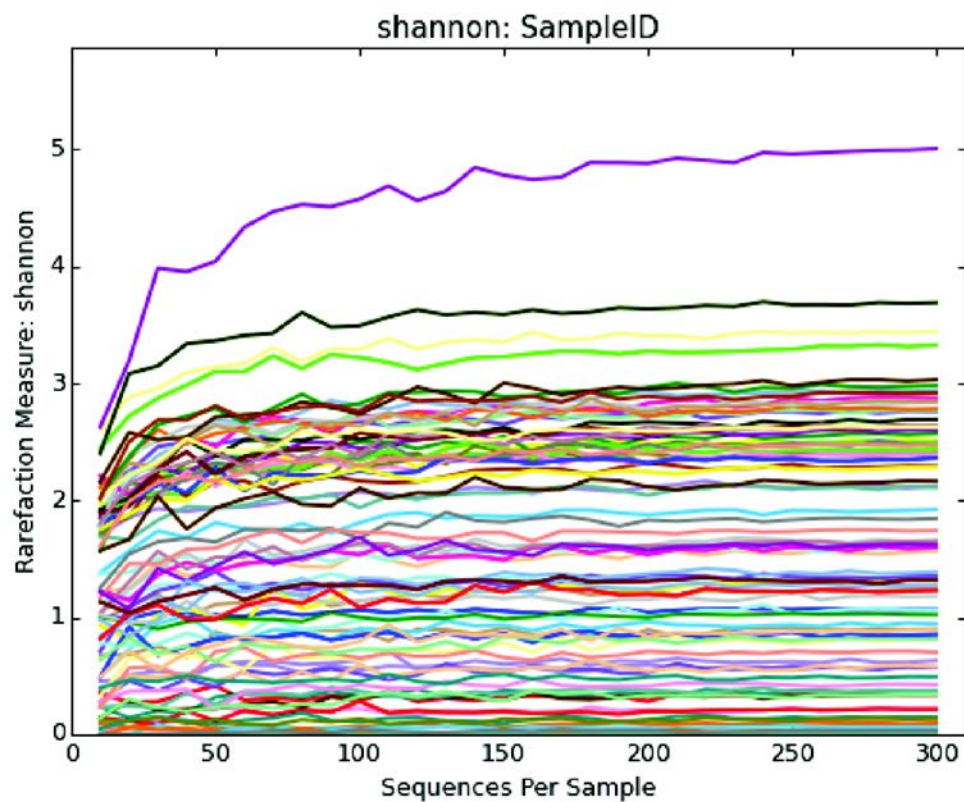

Fig. S4: **qPCR analysis of placental sample and controls for a given run:**

Using the logarithmic standard curve generated from one round of qPCR, copy number/ $\mu\text{L}$  of placental samples meeting stringent filtering criteria (rarefied to 300 OTUs, no singletons,  $>34$  copies/ $\mu\text{L}$  copy number) are highly significantly different from negative controls ( $p = 0.005$  by Mann-Whitney test).  $p = * < 0.05$ ;  $** < 0.005$

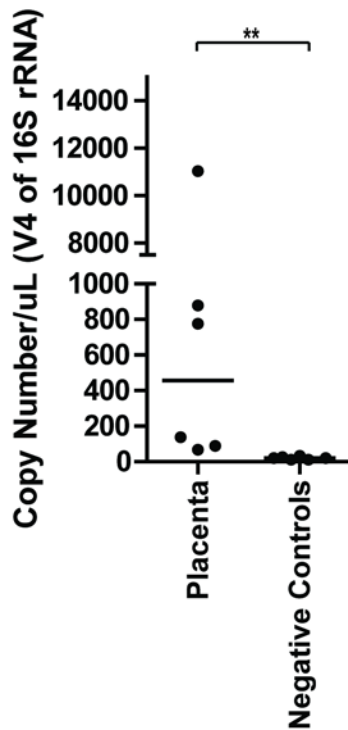

Fig. S5: **Multidimensional scaling (MDS) plot showing relationships between microbial profiles at placental locations using random\_tree in the R Phyloseq package.** Samples within the BP, PV, and FM were analyzed. Distance measurements are based on Bray-Curtis, unweighted UniFrac, and weighted UniFrac distance metrics (PERMANOVA, Bray:  $P = 0.001$ , weighted UniFrac:  $P = 0.001$ , weighted UniFrac:  $P = 0.001$ ).

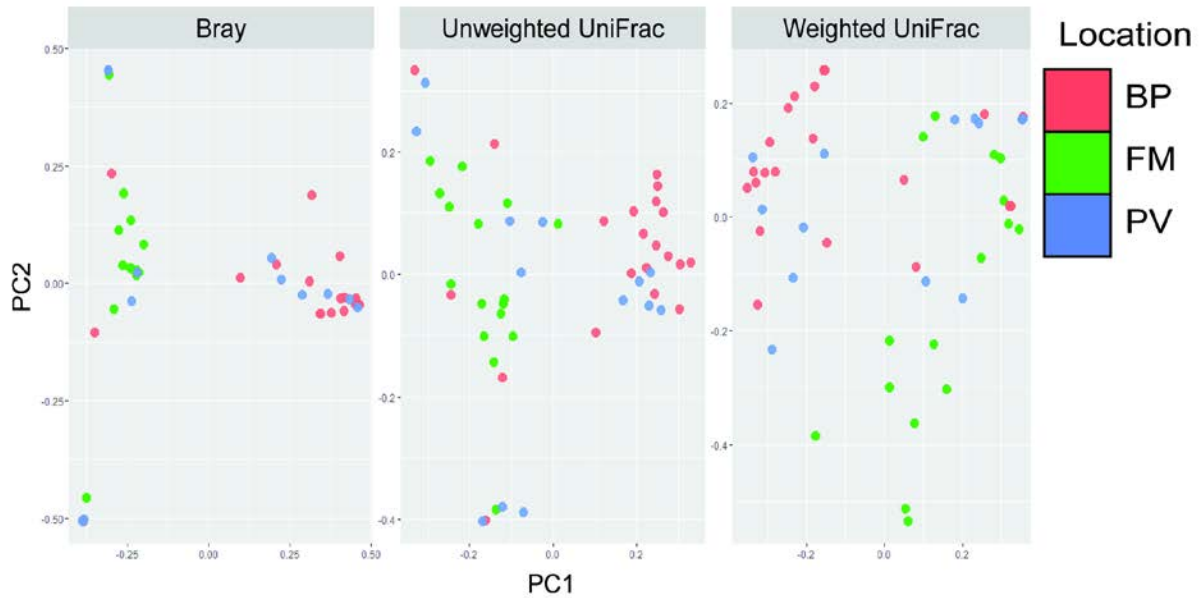

Fig. S6: **qPCR validation of *Ralstonia Insidiosa* presence in placentas using *R.i*-specific primers**

qPCR using *R.i*-specific primers confirmed *R.i* amplification in Basal Plate (BP) samples positive for *R.i* based on species-specific analysis. Each bar represents mean  $\pm$  SEM Cq value of each sample run in triplicate. Negative controls [Blanks (N=3), molecular biology grade water (N=1)], and samples that did not detect this particular taxa during sequencing; positive control [*E. coli*], did not amplify *R.i*.

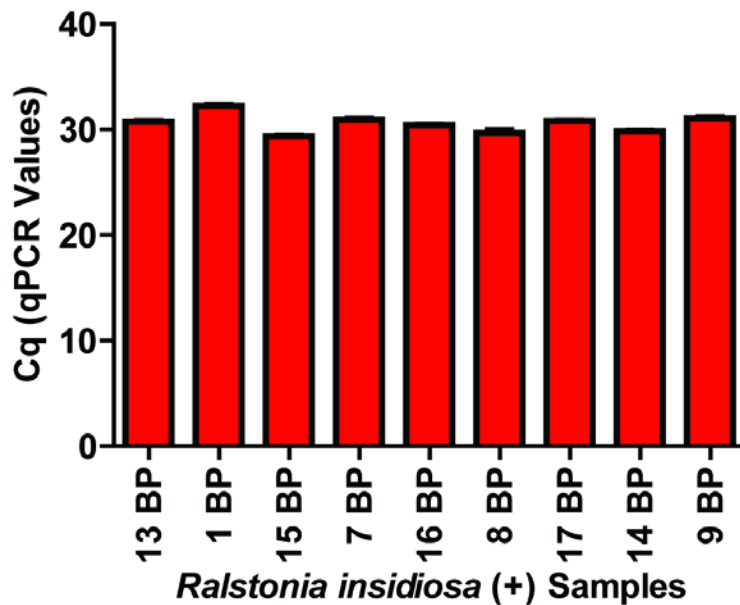

Supplement: Supplementary file 1 — Supplemental material [file 41598_2017_11514_MOESM1_ESM.pdf]
